# Supplementary material
Source: HighWire-hosted journal article supplement (https://gut.bmj.com/content/66/9/1563)
Supplement: inline-supplementary-material-1 [file inline-supplementary-material-1.pdf]

**Supplementary picture**

**A**

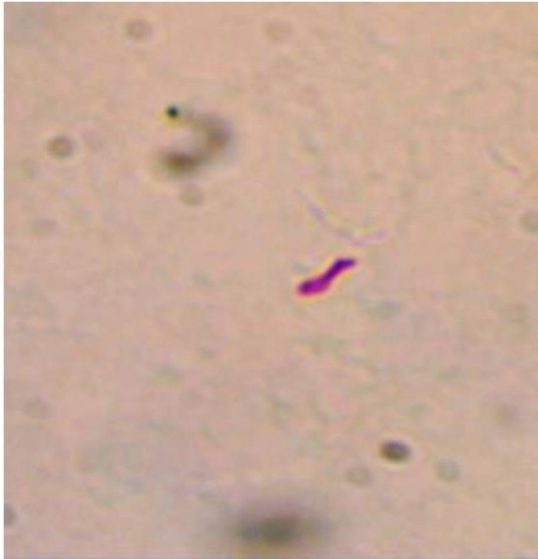

**B**

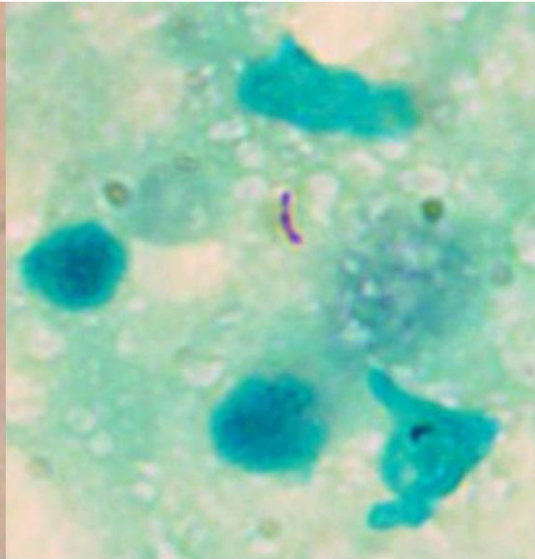

Mycobacterium demonstrating acid-alcohol fast staining using Ziehl-Neelsen's method following culture in liquid medium (A) and on direct staining of tissue sample (B). The lipid rich mycolic acids in the organism's cell wall prevent decolorisation with acid-alcohol after initial staining with carbol fuchsin (red)
